# Supplementary material
Source: PubMed Central journal article supplement (PMC8665011)
Supplement: NIHMS1738974-supplement-2.pdf [file NIHMS1738974-supplement-2.pdf]

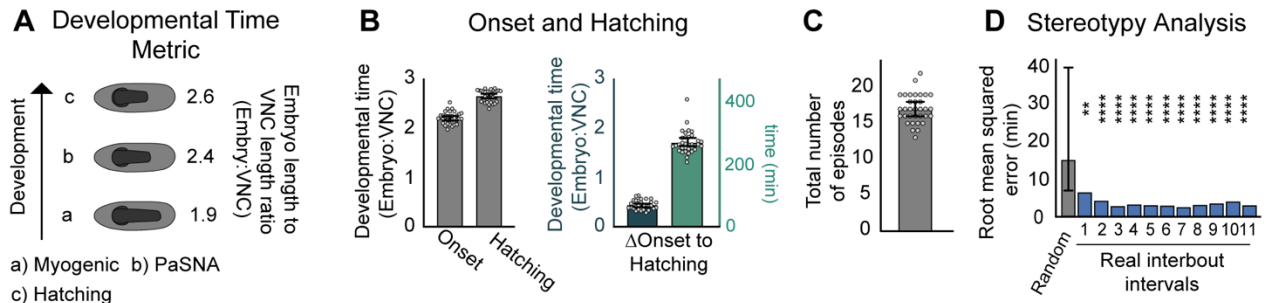

**Figure S1. Onset and length of PaSNA quantification. Related to Figure 1.**

**(A)** Developmental time metric used to quantify PaSNA onset and progression. **(B)** Onset and hatching measurements of PaSNA ( $n = 33$ ). **(C)** Number of total episodes from PaSNA onset to hatching ( $n = 33$ ). Bar plots represent mean with 95% confidence interval. **(D)** Interval stereotypy analysis in which the distribution of interpeak intervals across all embryos are compared to Poisson processes with the same mean (see Methods). \*\*  $p < 0.01$ , \*\*\*\*  $p < 0.0001$ ; two-sample t-test, Holm-Bonferroni correction.

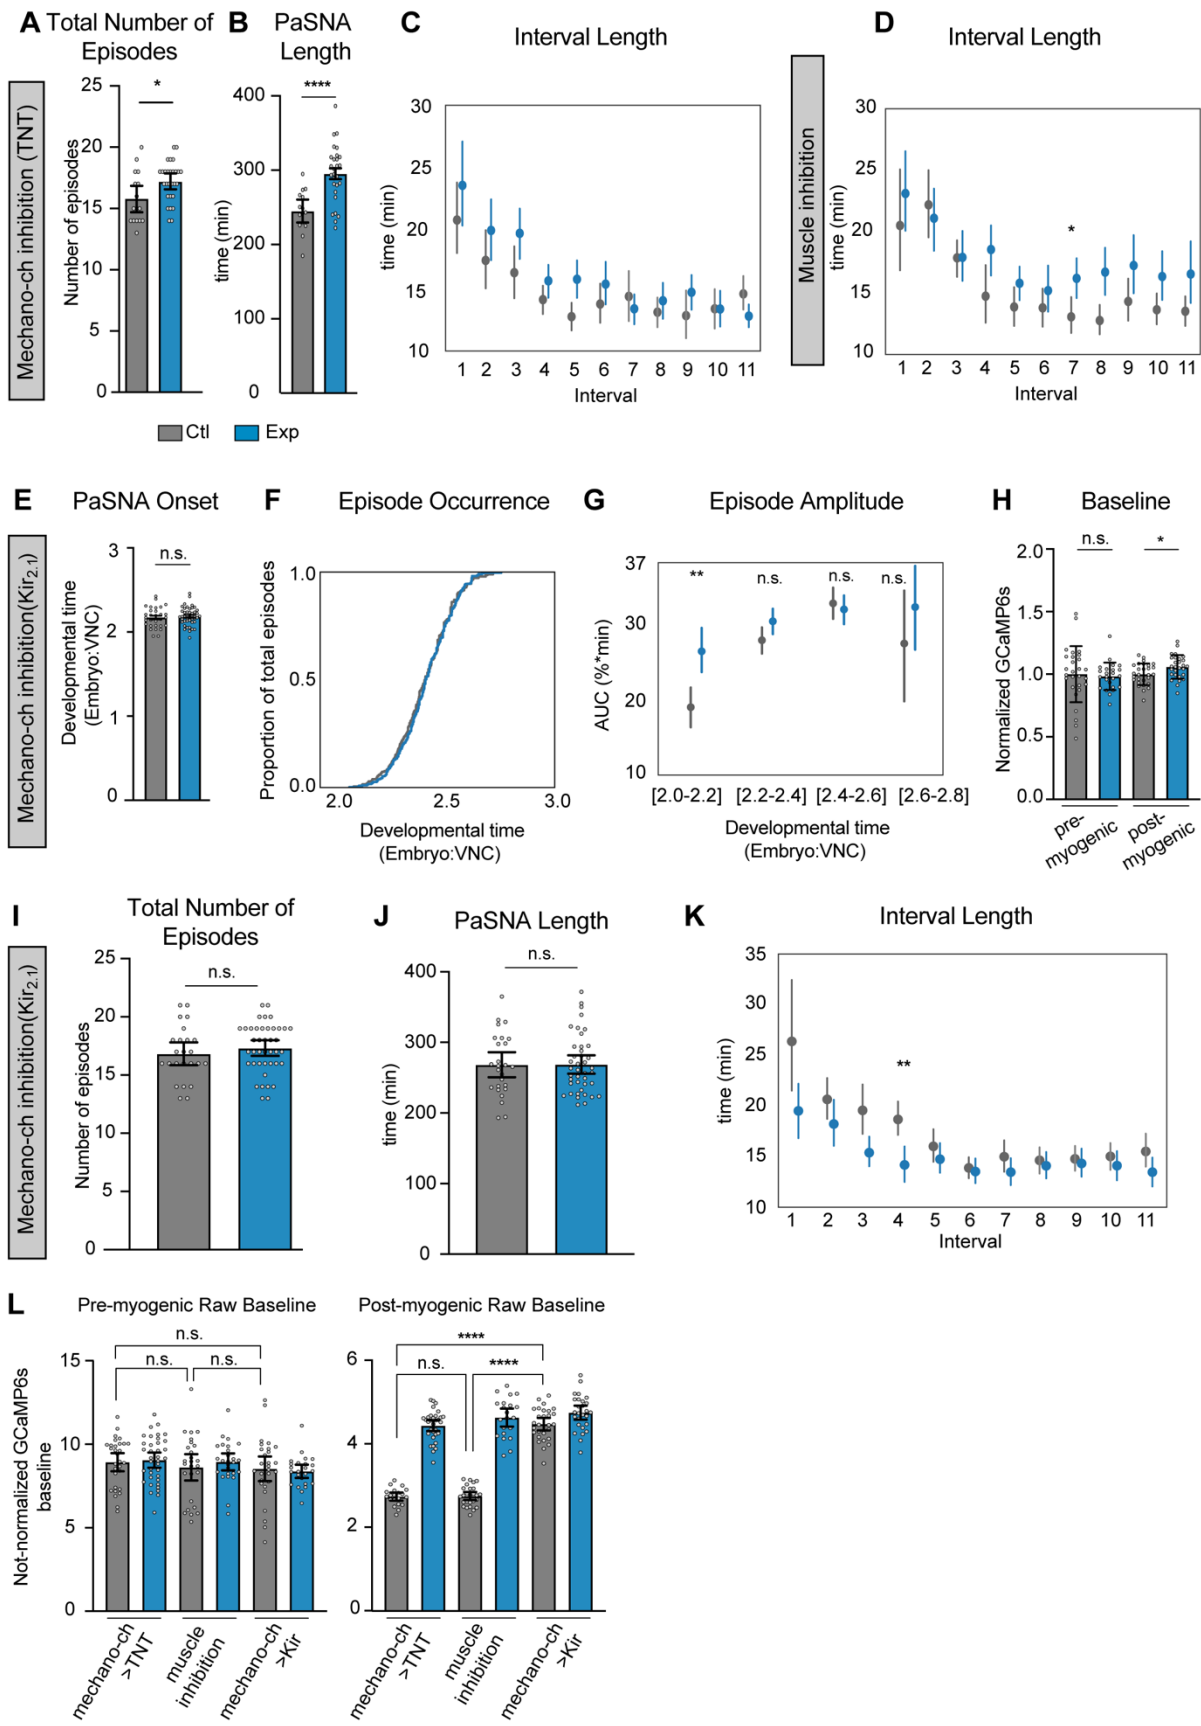

**Figure S2. Mechanosensory neurons modulate the amplitude of PaSNA episodes. Related to Figure 3.**

**(A-C)** Quantification of PaSNA phenotypes in control embryos in gray and experimental embryos expressing TNT in mechano-ch in blue. **(A)** Total number of episodes from PaSNA onset to hatching (n = 16 control; n = 28 experimental). **(B)** Time span from PaSNA onset to hatching (n = 16 control; 28 experimental). **(C)** Quantification of the first eleven interbout interval length (n = 17 control; n = 32 experimental). **(D)** Quantification of the first eleven interbout interval lengths (n = 28 control; n = 28 experimental) for control embryos in gray and experimental embryos expressing Kir<sub>2.1</sub> in muscles in blue. **(E-K)** Measurements of the timing and intensity of PaSNA for control embryos (gray) and experimental embryos expressing Kir<sub>2.1</sub> in mechano-ch neurons (blue). **(E)** Quantification of PaSNA onset (n = 30 control; n = 41 experimental). **(F)** Cumulative occurrence of the first twelve episodes plotted as the proportion of total episodes across developmental time (n = 27 control; n = 29 experimental). **(G)** AUC quantification for the first twelve episodes plotted against binned developmental time (n = 26, control; n = 41 experimental). **(H)** Quantification of GCaMP6s baseline levels normalized against control mean before (n = 28 control; n = 24 experimental) and after the myogenic phase (n = 28 control; n = 28 experimental). **(I)** Total number of episodes from PaSNA onset to hatching (n = 24 control; n = 41 experimental). **(J)** Time span from PaSNA onset to hatching (n = 26 control; n = 41 experimental). **(K)** Quantification of the first eleven interbout interval lengths (n = 27 control; n = 29 experimental). **(L)** Raw GCaMP6s baselines for control (gray) and experimental (blue) groups. Different experiments labeled on the X axis. As GCaMP6s and TdTomato are expressed at low levels during the pre-myogenic stage, we increased excitation power at this stage, making direct comparisons between pre- and post-myogenic stages impossible. For all point plots, points represent mean and lines depict the 95% confidence interval. For all bar graphs the mean and 95% CI are displayed. \*\*\*\*p<0.0001, \*\*\*p<0.005, \*\*p<0.005, \*p<0.05. For **(A)**, **(B)**, **(E)**, **(I)** and **(J)** we used a two-sample t-test. For **(C)**, **(D)**, **(G)** and **(K)** we used two-sample t-tests with Holm-Bonferroni correction. For **(H)** we used two-sample Welch's t-tests to account

for difference in variance. For (L) we used a Brown-Forsythe and Welch ANOVA followed by a Dunnett's T3 multiple comparison test to account for differences in variance. For genotypes information see Table S1.

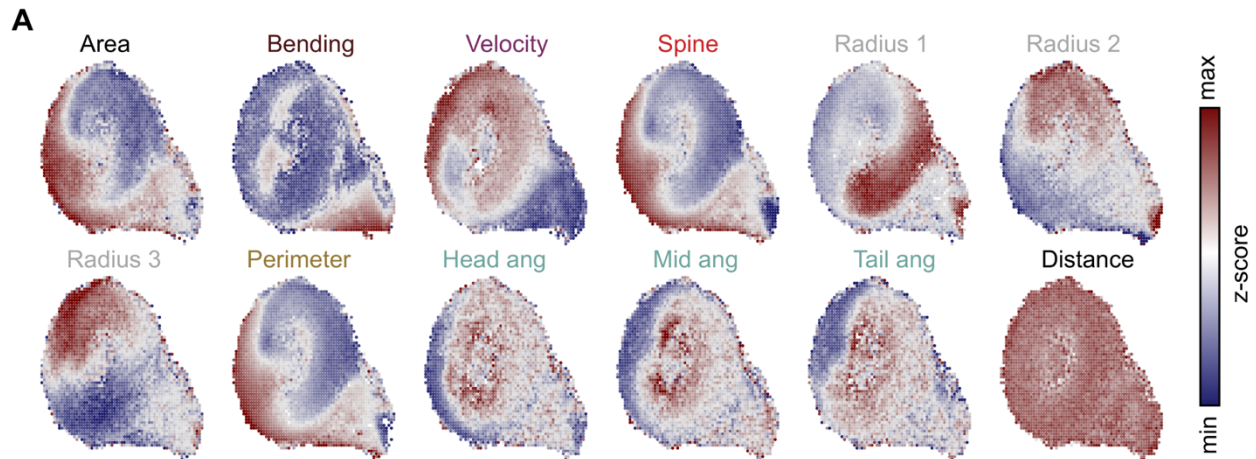

**Figure S3. Primary behavioral metrics as a function of larval behavioral space.**

**Related to Figure 4.**

The distribution of area, bending, velocity, spine length, radius 1, radius 2, radius 3, perimeter, head angle, middle body angle, tail angle, and distance as a function of larval behavior space (z-scores). Z-score scale to the right.
